# Supplementary material for: A highly sensitive, single selective, real-time and “turn-on” fluorescent sensor for Al3+ detection in aqueous media
Source: Royal Society of Chemistry journal article supplement (doi:10.1039/c2jm33393g), 2012-01-01
Supplement: c2jm33393g.pdf [file c2jm33393g.pdf]

**Supporting Information (SI)**

**A Highly Sensitive, Single Selective, Real-Time, and “Turn-On”  
Fluorescent Sensor for Al<sup>3+</sup> Detection in Aqueous Media**

**Xiaoyan Shi,<sup>[a]</sup> Huan Wang,<sup>[a]</sup> Tianyu Han,<sup>[a]</sup> Xiao Feng,<sup>[a]</sup> Bin Tong,<sup>\*[a]</sup> Jianbing  
Shi,<sup>[a]</sup> Junge Zhi,<sup>[b]</sup> and Yuping Dong<sup>\*[a]</sup>**

<sup>a</sup> College of Materials Science and Engineering, Beijing Institute of Technology,

5 South Zhongguancun Street, Beijing, 100081, China.

<sup>b</sup> College of Science, Beijing Institute of Technology, Beijing 100081, China

\* To whom correspondence should be addressed: Phone: +86-10-6894-8982; Fax:  
+86-10-6894-8982; E-mail: tongbin@bit.edu.cn (B. Tong); chdongyp@bit.edu.cn (Y.  
P. Dong)

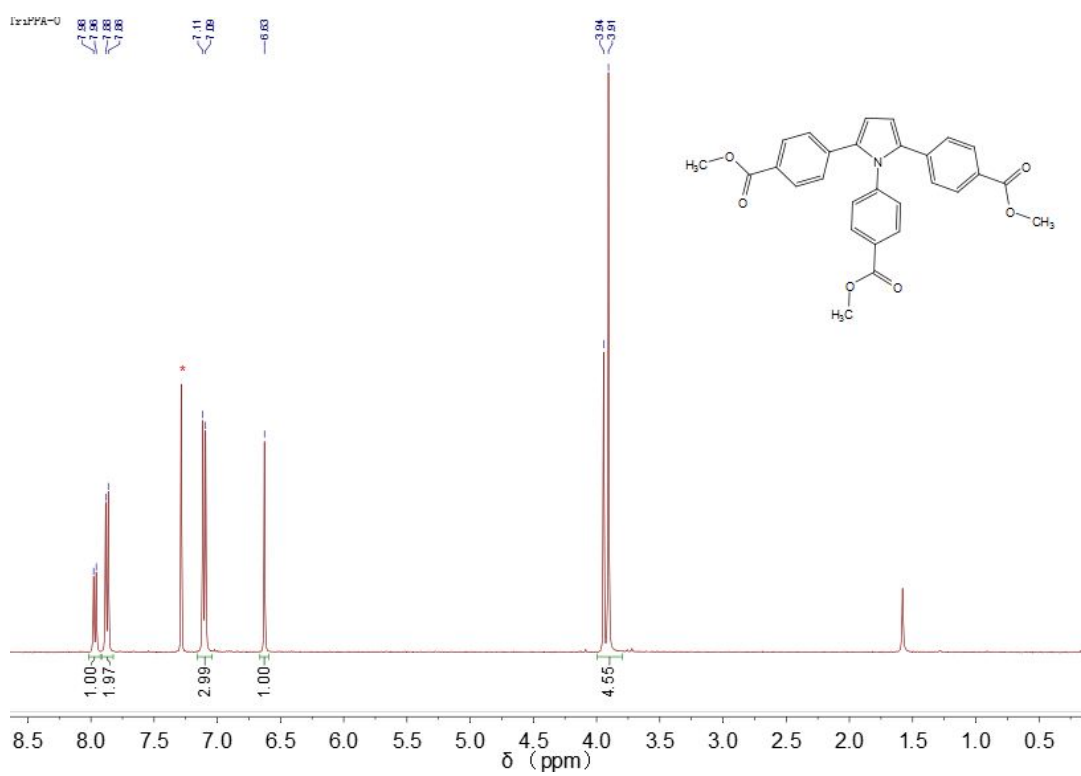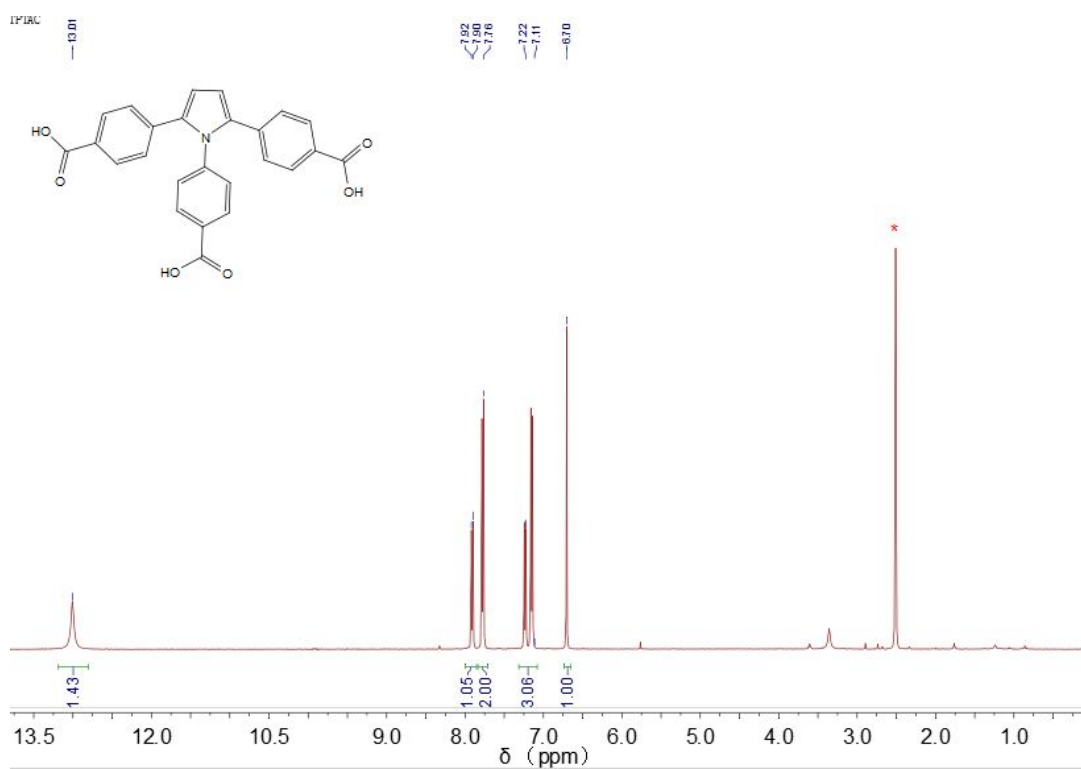

**Figure S1.** <sup>1</sup>H-NMR spectra of Py(PhCOOCH<sub>3</sub>)<sub>3</sub> and Py(PhCOOH)<sub>3</sub>

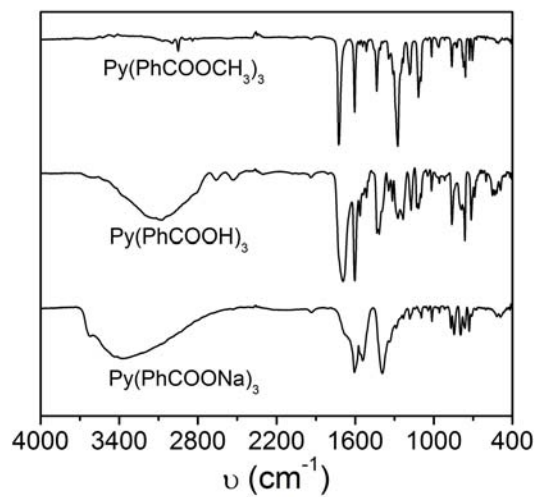

**Figure S2.** IR spectra of  $\text{Py}(\text{PhCOOCH}_3)_3$ ,  $\text{Py}(\text{PhCOOH})_3$ , and  $\text{Py}(\text{PhCOONa})_3$

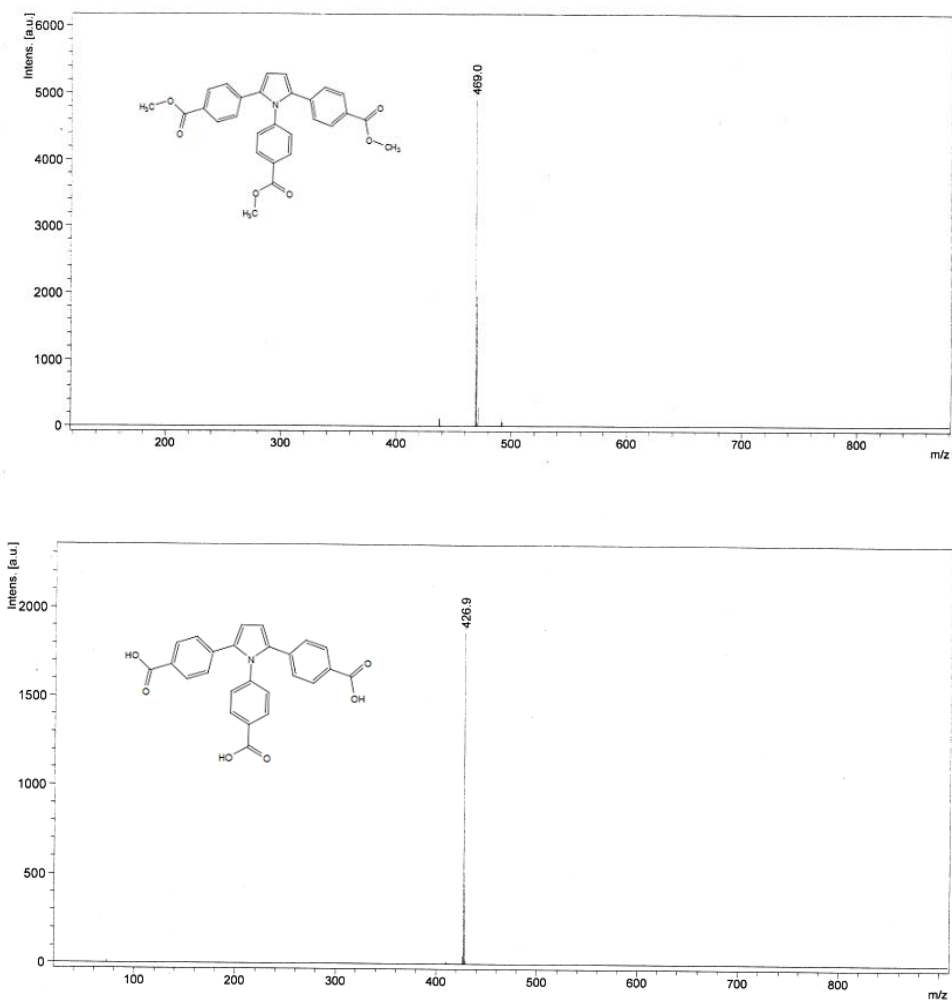

**Figure S3.** MS spectra of  $\text{Py}(\text{PhCOOCH}_3)_3$  and  $\text{Py}(\text{PhCOOH})_3$

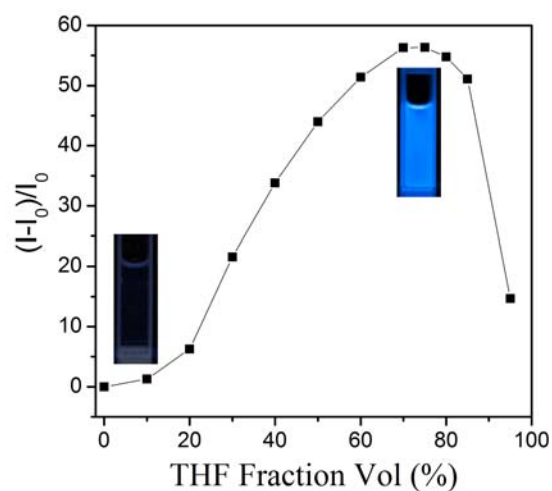

**Figure S4. Emission intensities of Py(PhCOO)<sub>3</sub> (10 μM) vs THF contents in H<sub>2</sub>O/THF mixtures.**

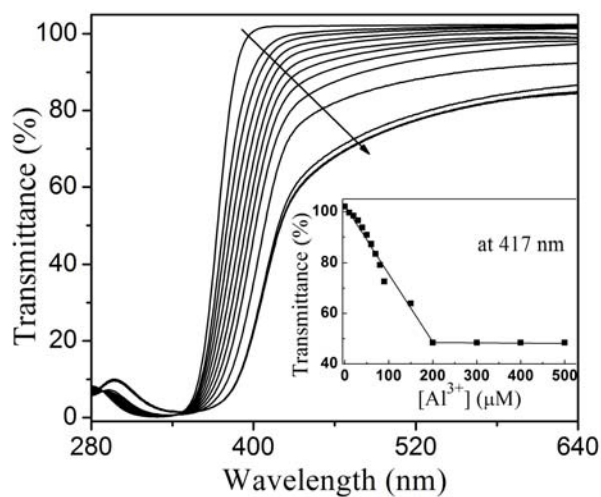

**Figure S5. Transmittance changes of Py(PhCOONa)<sub>3</sub>(100 μM) in water/THF (96/4, v/v) mixture upon titration of Al<sup>3+</sup>. The [Al<sup>3+</sup>] total increased from 0 μM to 500 μM along the direction of the arrow.**

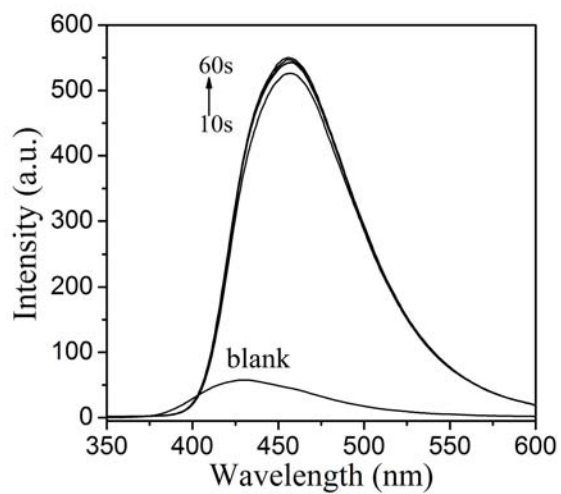

**Figure S6. Fluorescent spectra of Py(PhCOONa)<sub>3</sub> (100 μM) in water/THF (96/4, v/v) mixture in the presence of 500 μM Al<sup>3+</sup> at different times.**
